# Supplementary material
Source: PubMed Central journal article supplement (PMC2639401)

**Supplementary Fig.1. Fluorescent co-localisation of oestrogen receptor related beta (ERR $\beta$ ) (red) and ER $\beta$  (green) on full thickness endometrial biopsies recovered throughout the normal human menstrual cycle.**

The functional layer closest to the lumen of the uterus is at the top and the myometrium at the base of each strip. Tissues recovered during the following phases of the cycle: EP, early proliferative; MP, mid proliferative; LP, late proliferative; ES, early secretory; MS, mid secretory; LS, late secretory; M menstrual. Note intense expression of ER $\beta$  in the myometrium, co-expression of both receptors in glandular epithelial cells (yellow nuclei e.g. MP, LP, ES).

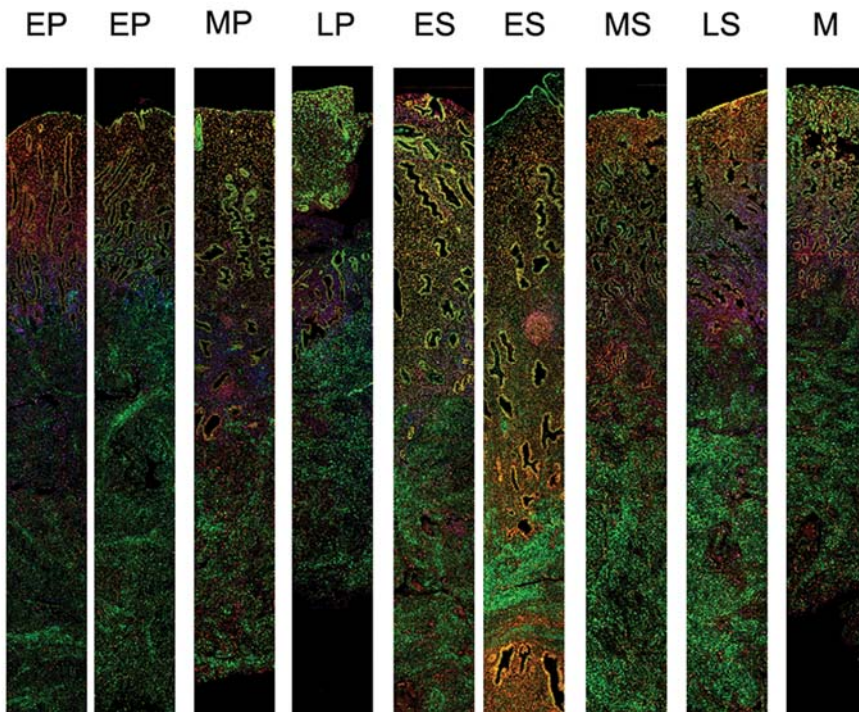

Supplement: den298_1.pdf [file den298_1.pdf]
